# Supplementary material for: A bis(terpyridine)iron network polymer on carbon for a potential energy storage material
Source: Royal Society of Chemistry journal article supplement (doi:10.1039/c3dt51186c), 2013-01-01
Supplement: c3dt51186c.pdf [file c3dt51186c.pdf]

Electronic Supplementary Information (ESI)

## **A bis(terpyridine)iron network polymer on carbon for a potential energy storage material**

Kuo-Hui Wu, Hiroaki Maeda, Tetsuya Kambe, Ken Hoshiko, Eunice Jia Han Phua, Ryota Sakamoto, Hiroshi Nishihara\*

Department of Chemistry, Graduate School of Science, The University of Tokyo, 7-3-1, Hongo, Bunkyo-ku, Tokyo 113-0033, Japan.

### **Materials**

All reagents and materials were used directly without purification. 4'-Chloro-2,2':6',2''-terpyridine (4'-Cl-tpy, 99 %) was obtained from Acros Organics. Hydrazine monohydrate (98%), 2-methyl-1-propanol (98%), and HPLC grade acetonitrile (99.8%) were from Wako Pure Chemical Industries, Ltd. Iron(II) tetrafluoroborate hexahydrate ( $\text{Fe}(\text{BF}_4)_2 \cdot 6\text{H}_2\text{O}$ , 97 %) was from Sigma-Aldrich, and 3 mm diameter glassy carbon rods were purchased from Tokai Carbon Co., Ltd.

### **Instrument**

Electrochemical experiments were conducted by an ALS 750A electrochemical analyzer (BAS. Co., Ltd.).

### **Experiments**

#### **Electrode preparations**

The glassy carbon was sealed in a glass or Teflon tube and polished subsequently by 500, 1000, 2000 mesh sandpapers and 0.3  $\mu\text{m}$   $\text{Al}_2\text{O}_3$ . After that, the electrodes were washed by plenty of water, and then ultrasonicated by water and acetone. Finally, they were dried by air and used directly.

#### **Synthesis of 4'-hydrazinylterpyridine:**

The ligand was prepared according to a literature procedures with some alterations.<sup>1</sup> 4'-Chloro-2,2':6',2''-terpyridine (1.64 g, 6.2 mmol) and hydrazine monohydrate (8 mL) was dissolved in 12 mL isobutanol and heated to reflux overnight. The reaction was checked by TLC for completion. After 4'-chloroterpyridine completely reacted with hydrazine, the reaction was cooled to room temperature. 50 mL water was added, and the resulting mixture was extracted by  $\text{CH}_2\text{Cl}_2$ . The organic phase was washed by sat.

$\text{NaCl}_{(aq.)}$  and dried over  $\text{MgSO}_4$ . A white solid was obtained upon evaporation in 94 % yield (1.52 g).

#### Synthesis of bis(4'-hydrazinylterpyridine)iron(II) complex, **1**:

4'-hydrazinylterpyridine (5.27 mg, 0.02 mmol) and  $\text{Fe}(\text{BF}_4) \cdot 6\text{H}_2\text{O}$  (3.38 mg, 0.01 mmol) was stirred in 10 mL acetonitrile for 1 h at room temperature. The resulting purple solution is the desired complex and can be used in the following experiment without further treatment.

#### Electrochemical modification of the glassy carbon electrode by **1**:

The solution for electromodification reaction was prepared by mixing the solution of **1** with  $\text{Bu}_4\text{NBF}_4$  (0.33 g, 10 mmol). A glass carbon electrode was used as the working electrode, platinum electrode as counter electrode, and  $\text{Ag}^+/\text{Ag}$  electrode as reference electrode. The reaction was carried out by cyclic voltammetry from 1.5 V to  $-1.5$  V at a scan rate of  $0.2 \text{ Vs}^{-1}$  under an air atmosphere with argon bubbling to stir the solution.

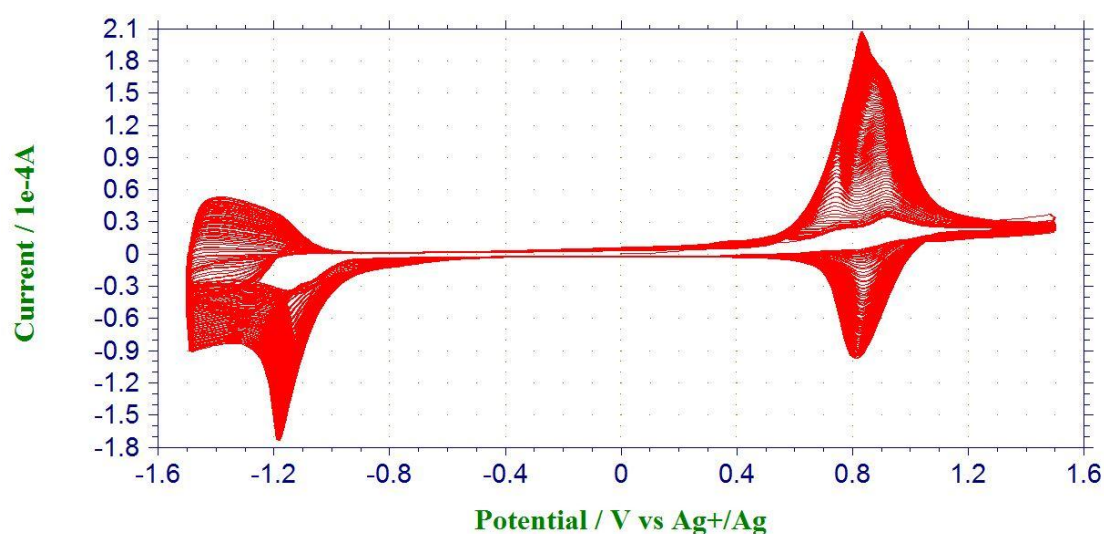

Fig. 1S. Cyclic voltammogram of electrochemical modification of the glassy carbon electrode by **1**.

#### Reference:

- 1 Z. Zhou, G. H. Sarova, S. Zhang, Z. Ou, F. T. Tat, K. M. Kadish, L. Echegoyen, D. M. Guldi, D. I. Schuster, S. R. Wilson, *Chem. Eur. J.* **2006**, *12*, 4241.
